# Supplementary material
Source: publisher figshare collection journal article supplement (https://acs.figshare.com/ndownloader/files/3616992)
Supplement: Supplementary file 1 [file 3616992]

## **Folate Receptor-mediated Enhanced and Specific Delivery of Far-red Light-activatable Prodrugs of Combretastatin A-4 to FR-positive Tumor**

Gregory Nkepang<sup>†</sup>, Moses Bio<sup>†</sup>, Pallavi Rajaputra<sup>†</sup>, Samuel Awuah<sup>†</sup>, and Youngjae You<sup>†,‡,\*</sup>.

<sup>†</sup>Department of Pharmaceutical Sciences, University of Oklahoma Health Sciences Center, Oklahoma City, Oklahoma 73117, United States

<sup>‡</sup>Department of Chemistry and Biochemistry, University of Oklahoma, Norman, Oklahoma 73019, United States

Corresponding author: Youngjae You, phone: 1-405-271-6593, ext. 47473; fax: 1-405-271-7505; email: [youngjae-you@ouhsc.edu](mailto:youngjae-you@ouhsc.edu)

**Supplementary Information (SI)**

## Table of Contents

|                                                                                                                                                               |    |
|---------------------------------------------------------------------------------------------------------------------------------------------------------------|----|
| <b>Scheme S1.</b> Preparation of compound <b>13</b> .....                                                                                                     | 1  |
| <b>Scheme S2.</b> Synthesis of compounds <b>15</b> and <b>17</b> .....                                                                                        | 2  |
| <b>Figure S1.</b> Absorption spectra of prodrugs <b>1-5</b> .....                                                                                             | 3  |
| <b>Figure S2.</b> Body weight changes during the antitumor study.....                                                                                         | 4  |
| <b>Figure S3.</b> Dark toxicity of prodrugs <b>1-5</b> .....                                                                                                  | 4  |
| <b>Figure S4.</b> Confocal microscopic images of colon 26 cells with prodrugs <b>4</b> and <b>5</b> .....                                                     | 5  |
| <b>Figures S5, S6, &amp; S7.</b> <sup>1</sup> H-NMR, peak assignment, and HRMS of compound <b>7</b> .....                                                     | 6  |
| <b>Figures S8, S9, &amp; S10.</b> <sup>1</sup> H, <sup>13</sup> C-NMR, and HRMS of compound <b>8</b> .....                                                    | 8  |
| <b>Figures S11, S12, &amp; S13.</b> <sup>1</sup> H, <sup>13</sup> C-NMR, and HRMS of compound <b>9</b> .....                                                  | 11 |
| <b>Figures S14 &amp; S15.</b> <sup>1</sup> H-NMR and LRMS of compound <b>15</b> .....                                                                         | 12 |
| <b>Figures S16 &amp; S17.</b> <sup>1</sup> H-NMR and LRMS of compound <b>17</b> .....                                                                         | 13 |
| <b>Figures S18, S19, S20, S21, &amp; S22.</b> <sup>1</sup> H-NMR, peak assignment, <sup>13</sup> C-NMR, HRMS, and HPLC chromatogram of prodrug <b>1</b> ..... | 14 |
| <b>Figures S23, S24, S25, &amp; S26.</b> <sup>1</sup> H-NMR, <sup>13</sup> C-NMR, HRMS, and HPLC chromatogram of prodrug <b>2</b> .....                       | 17 |
| <b>Figures S27, S28 &amp; S29.</b> <sup>1</sup> H-NMR, HRMS, and HPLC chromatogram of prodrug <b>3</b> .....                                                  | 19 |
| <b>Figures S30, S31, &amp; S32.</b> <sup>1</sup> H-NMR, peak assignment, peak integrations of prodrug <b>4</b> .....                                          | 21 |
| <b>Figures S33, S34, &amp; S35.</b> <sup>1</sup> H-NMR, HRMS, and HPLC chromatogram of prodrug <b>5</b> .....                                                 | 24 |
| <b>Figure S36.</b> Photographic images of mice treated with prodrugs <b>4</b> and <b>5</b> .....                                                              | 26 |
| <b>Figure S37.</b> Additional optical images of mice treated with prodrugs <b>1-5</b> .....                                                                   | 27 |



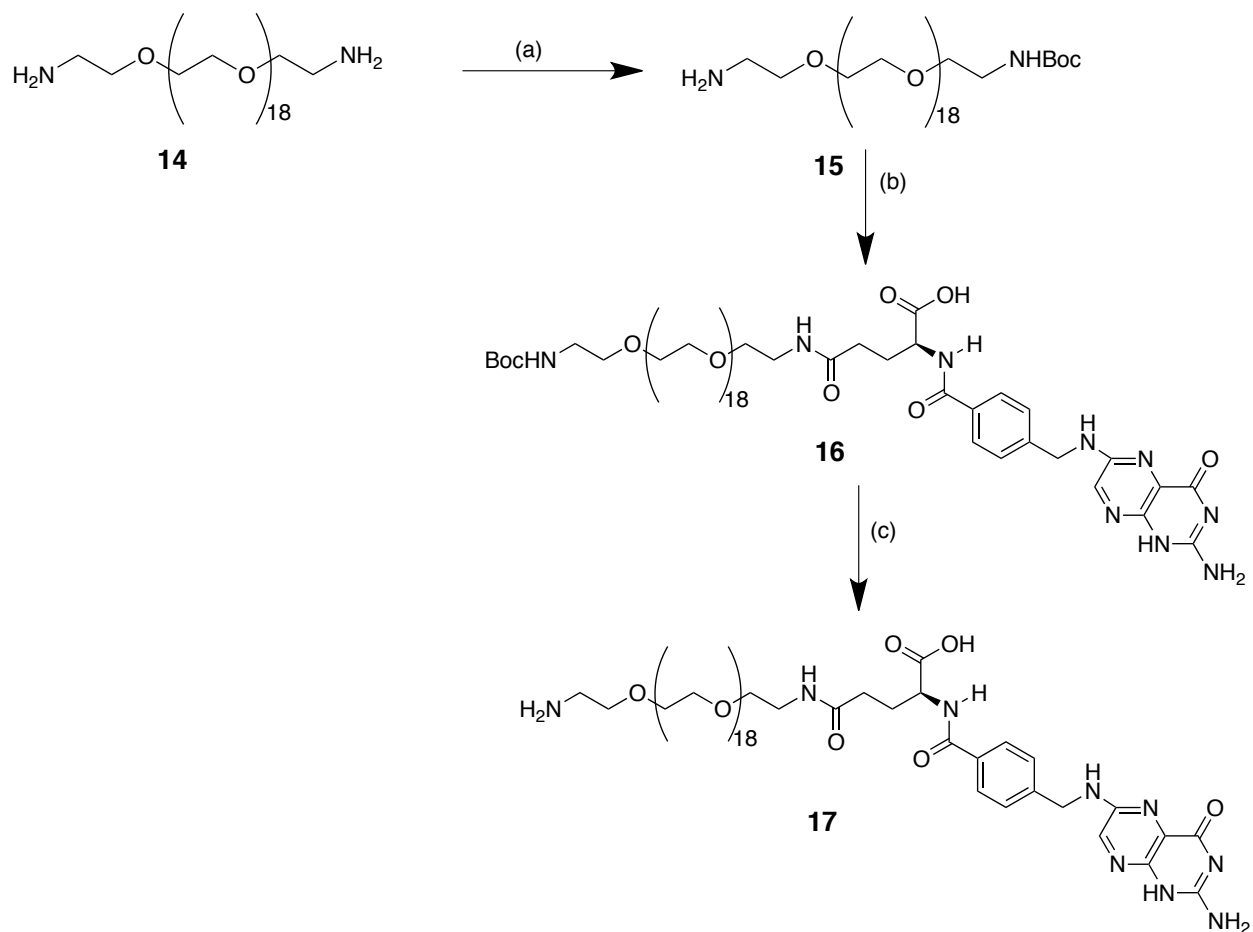

**Scheme S2.** Synthesis for compounds **15** and **17**. (a) Diamine **14** (1 eq.), Boc<sub>2</sub>O (1 eq.) TEA (3 eq.), anhydrous MeOH (9.31 mL), reflux, 24 h, 72% yield. (b) sonicated FA (1 eq) in DCC (6.7 eq), 30 min, DMF/Pyridine (5:1 v/v), **15** (1 eq.), rt, 36 h precipitate in cold Et<sub>2</sub>O/Acetone (3:1 v/v), 73% yield. C) TFA, rt, 4 h.

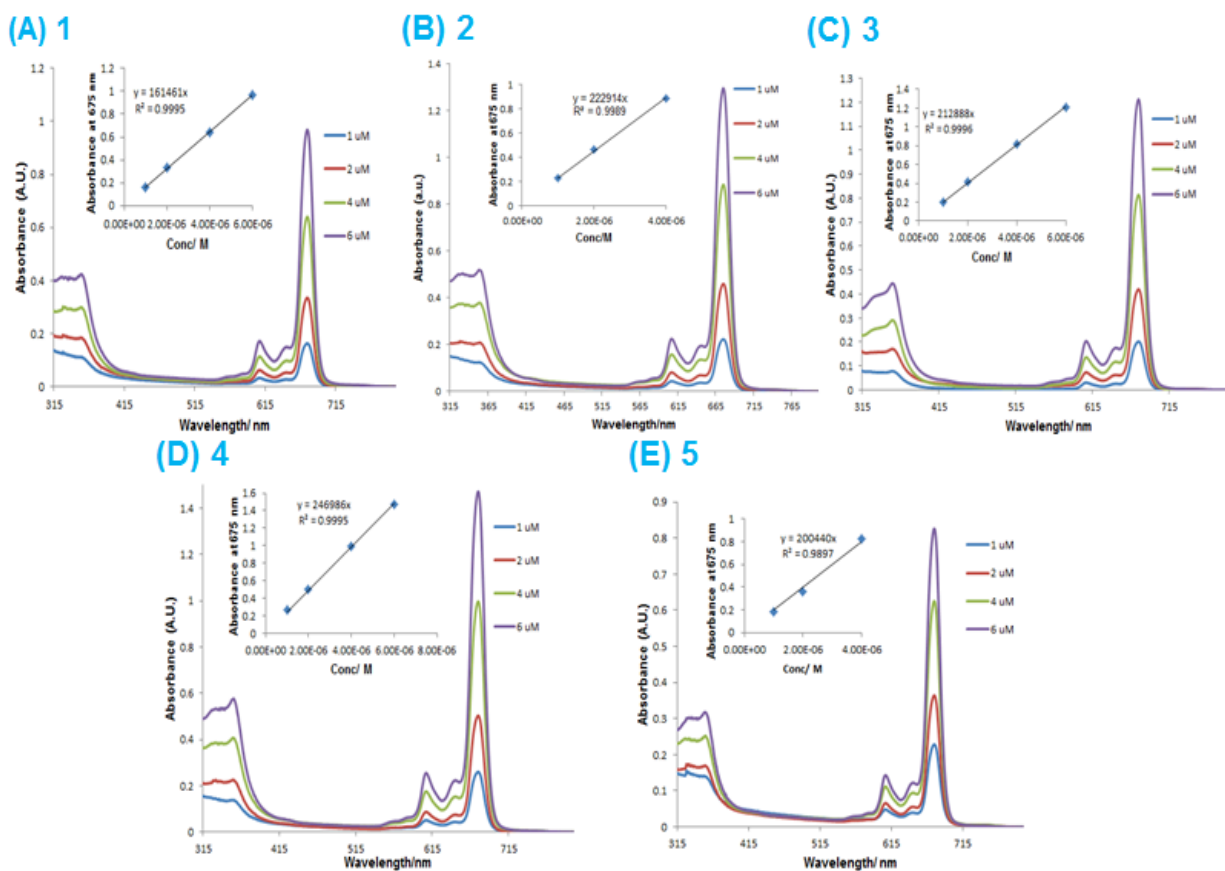

**Figure S1.** Absorption spectra of prodrugs (A) prodrug 1, (B) prodrug 2, (C) prodrug 3, (D) prodrug 4, and (E) prodrug 5 in DMF at different concentrations. The inset of each spectrum plots the Q-band absorbance vs. concentration of the conjugate.

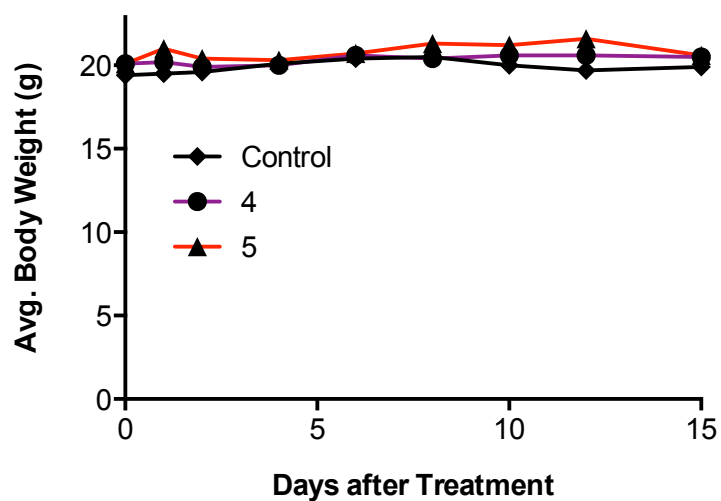

**Figure S2.** Body weight changes during the antitumor efficacy study. Changes are presented as an average of all three mice in each group. SD values were not added, for clarity.

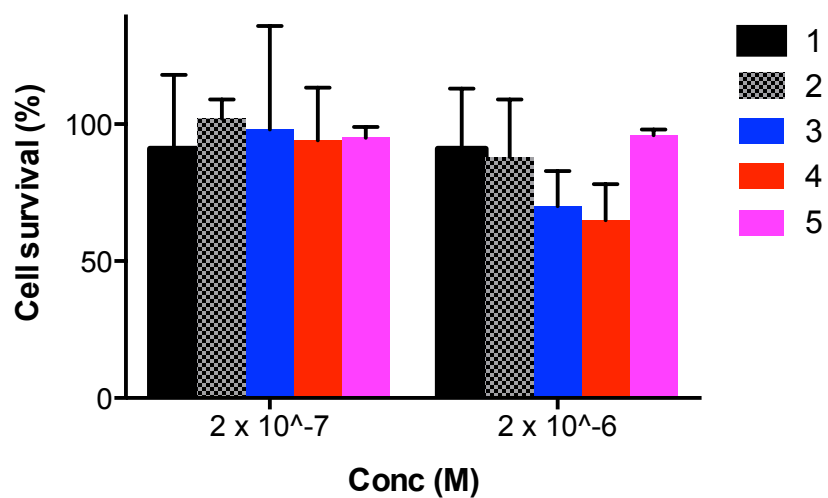

**Figure S3.** Dark toxicity of prodrugs 1-5.

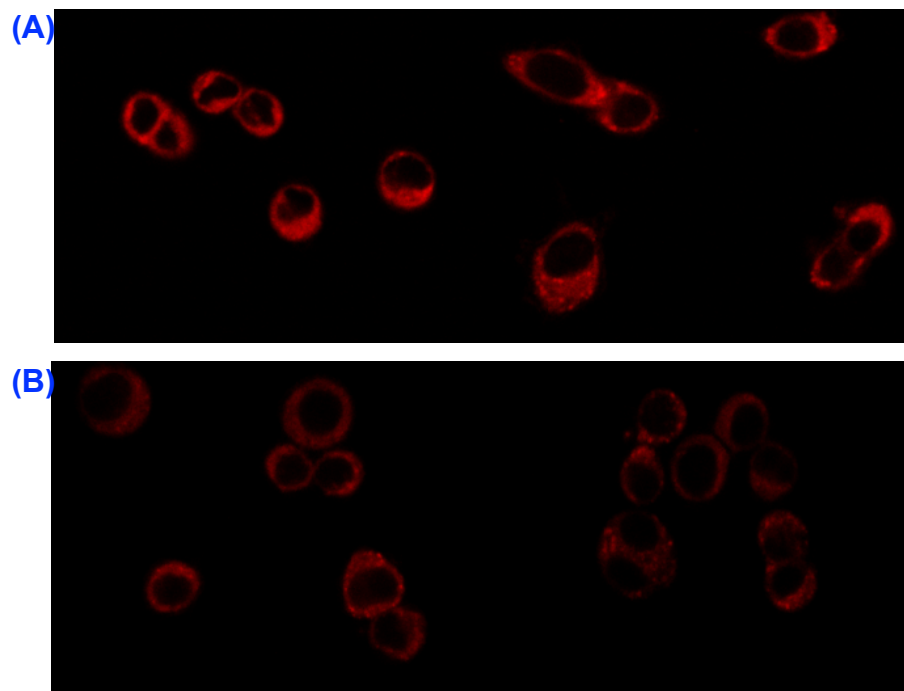

**Figure S4.** Confocal microscopy images of colon 26 cells incubated for 1 h 15 min with (A) prodrug 4 and (B) prodrug 5 at the concentration of 20  $\mu$ M (excitation at 633 nm and emission at 640 – 700 nm).

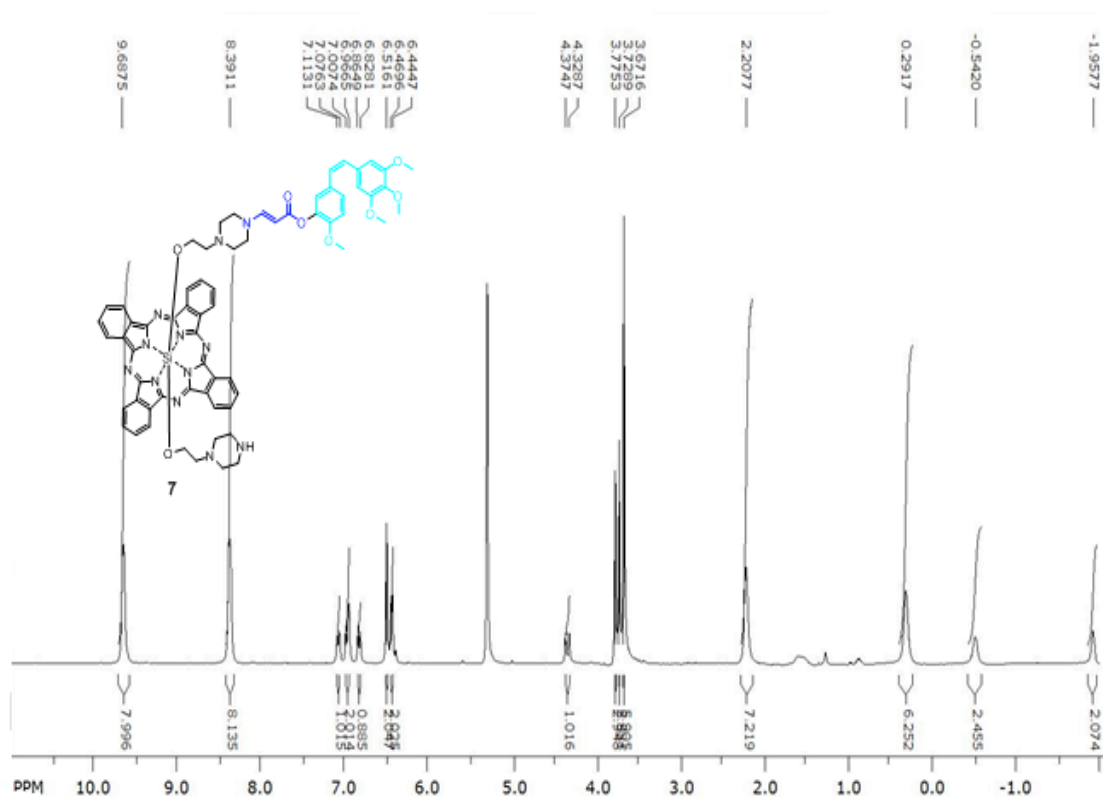

**Figure S5:**  $^1\text{H}$ -NMR of compound 7.

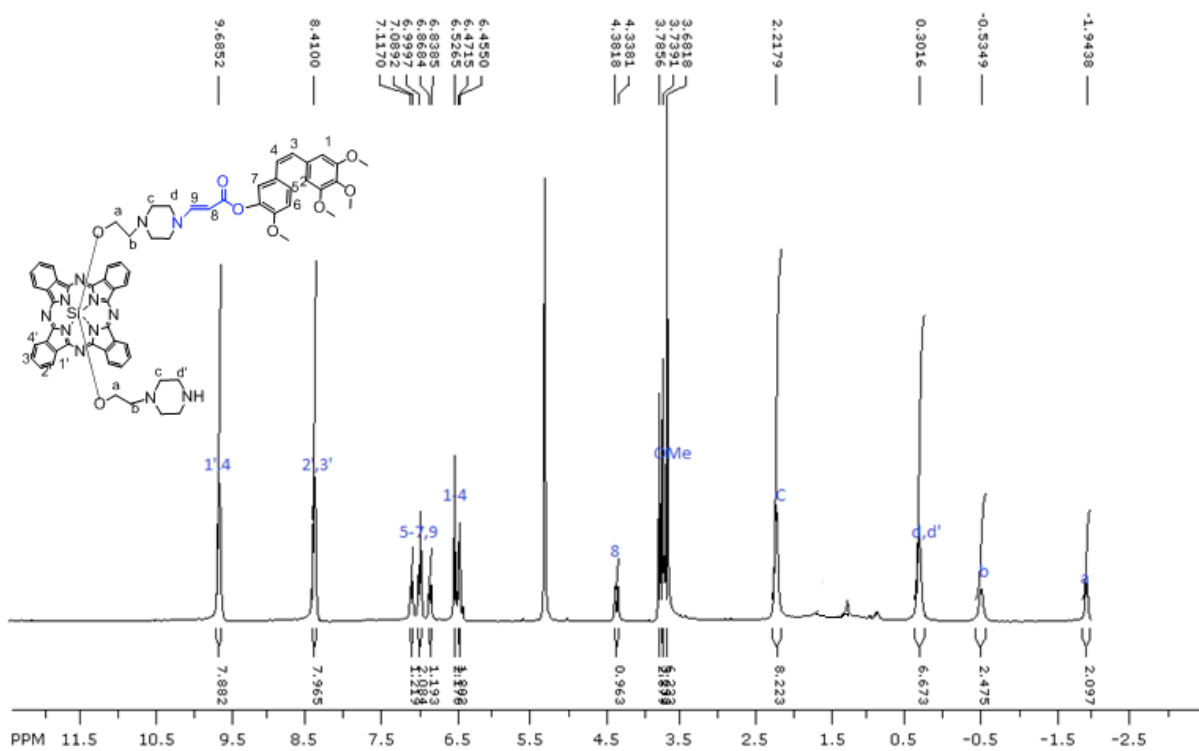

**Figure S6:** Peak Assignment on  $^1\text{H}$ -NMR of compound 7.



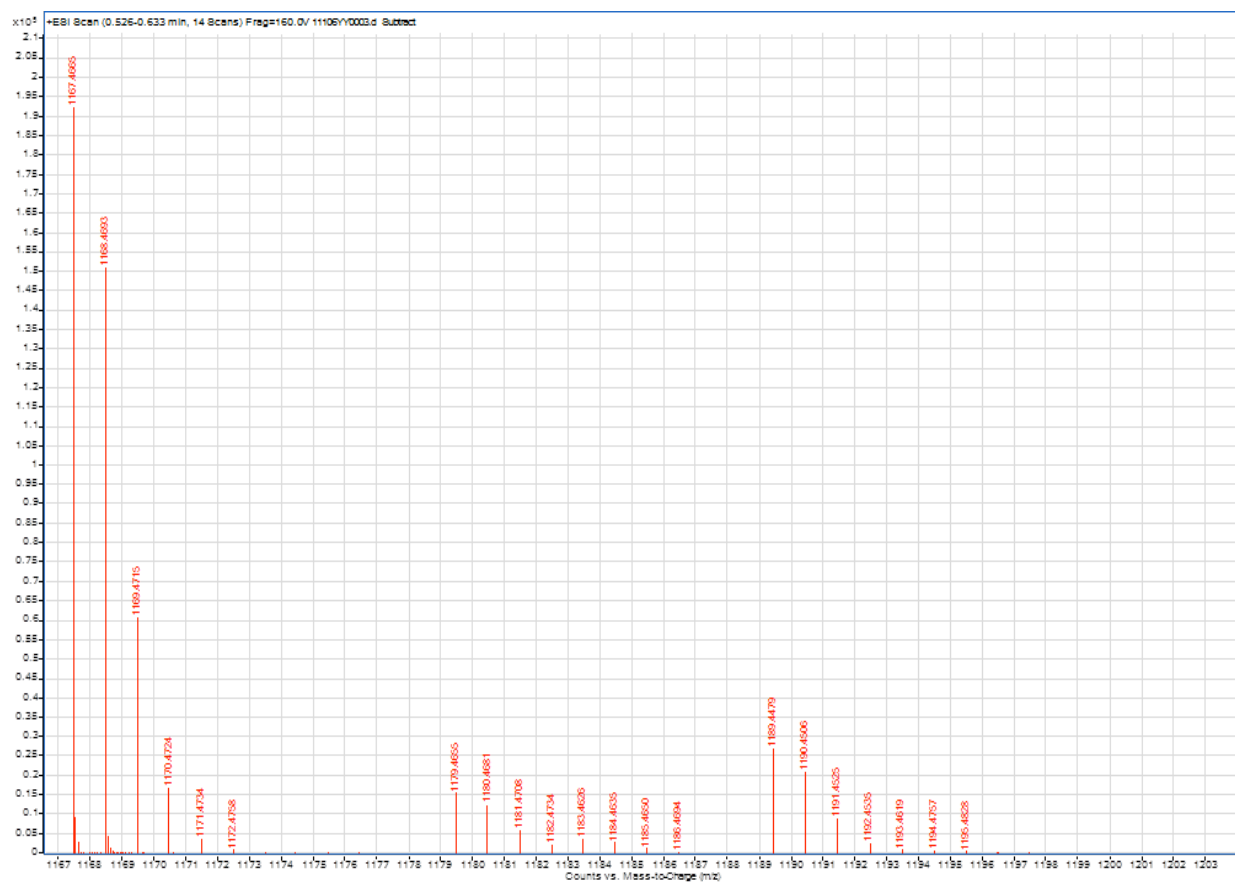

**Figure S7.** HRMS (ESI) of compound **7**. Calculated for  $\text{C}_{65}\text{H}_{63}\text{N}_{13}\text{O}_8\text{Si}$   $[\text{M} + \text{H}]^+$ : 1167.2661 and  $\text{C}_{65}\text{H}_{61}\text{N}_{12}\text{O}_8\text{SiNa}$   $[\text{M} + \text{Na}]^+$ : 1189.4481, found: m/z 1167.4665 and 1189.4479.

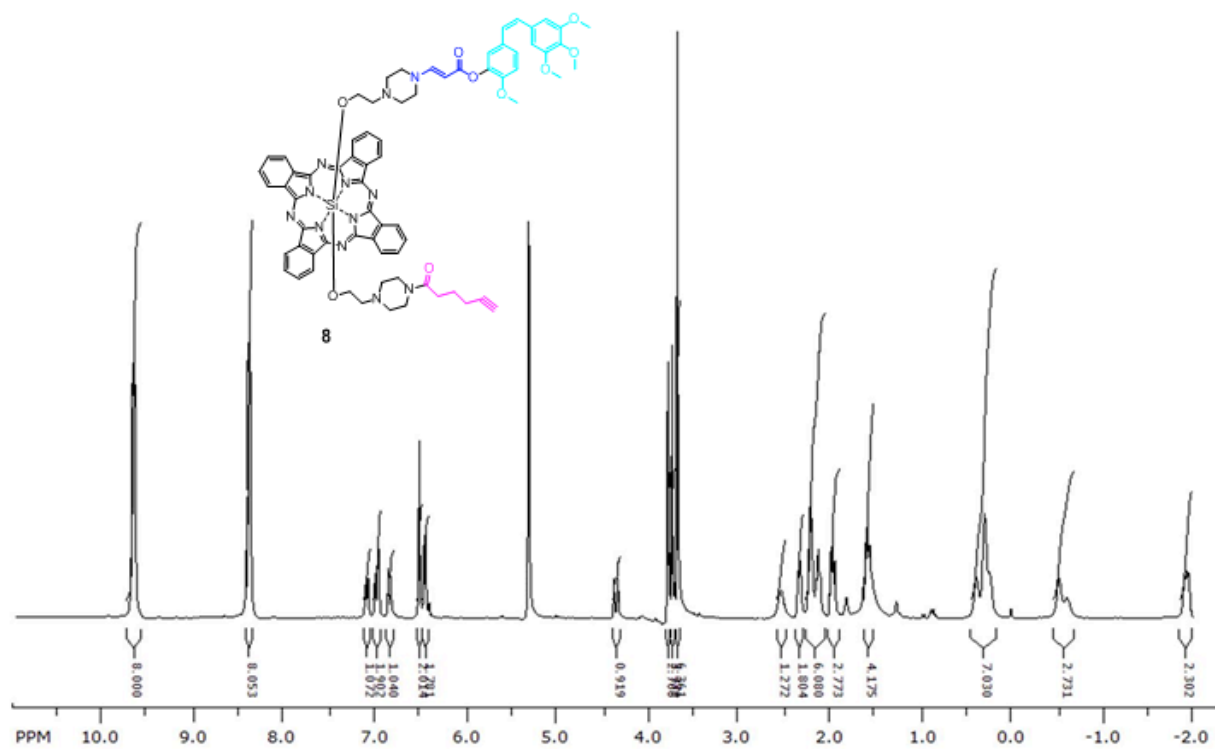

Figure S8.  $^1\text{H}$ -NMR of compound 8.

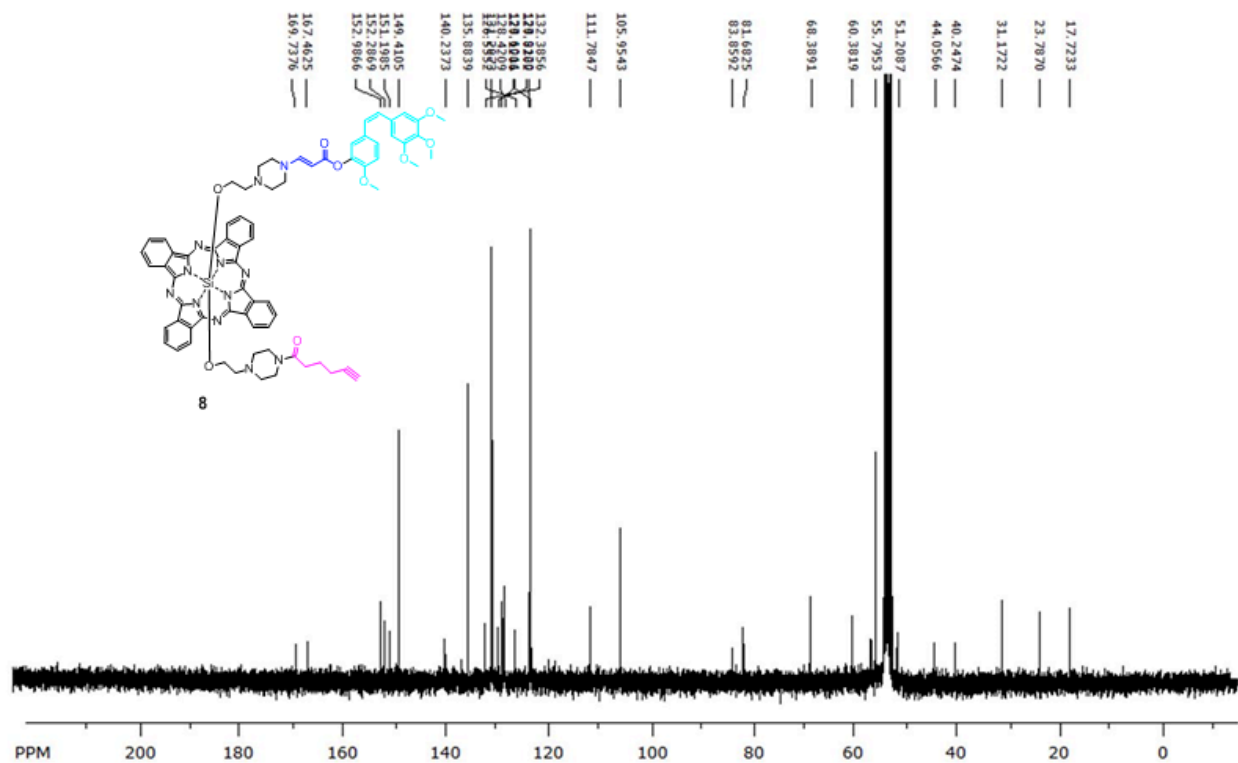

Figure S9.  $^{13}\text{C}$ -NMR of compound 8.

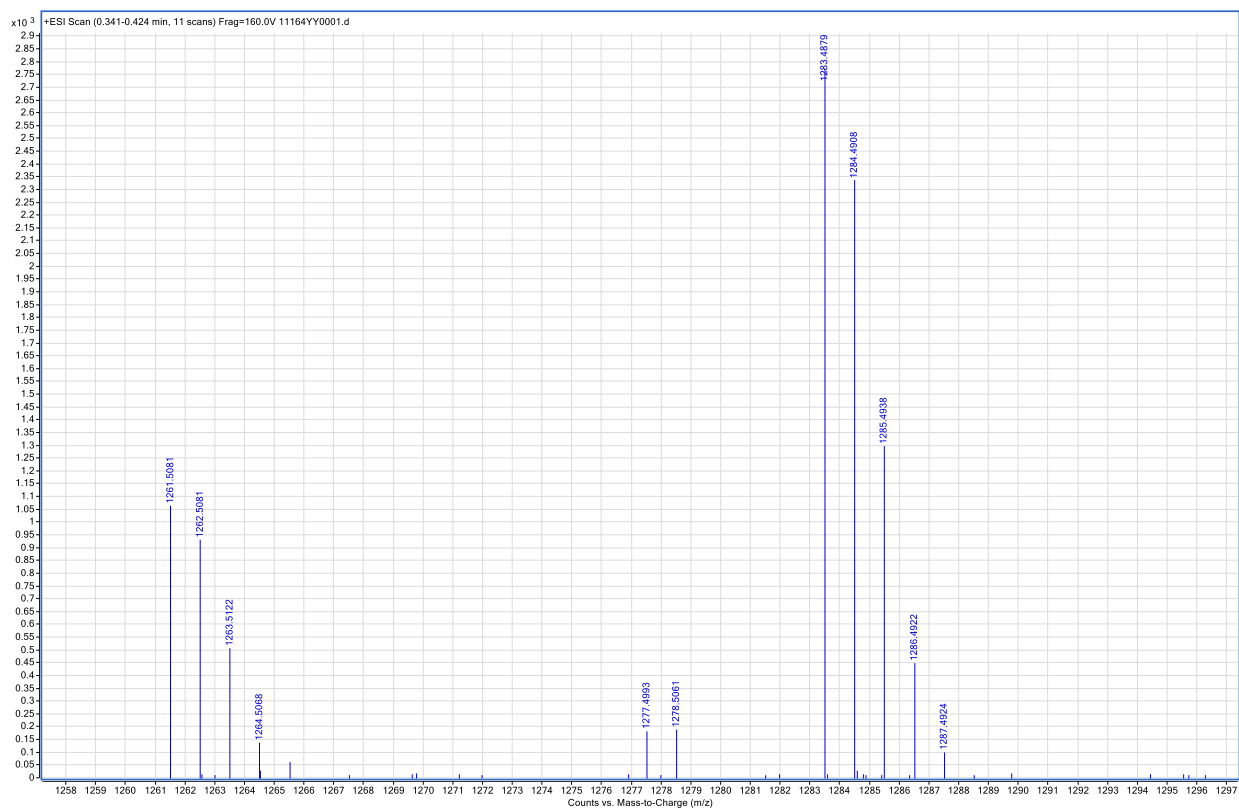

**Figure S10.** HRMS-ESI of compound **8**. Calculated for  $C_{71}H_{69}N_{12}O_9Si$   $[M+H]^+$ : 1261.5090 and  $C_{71}H_{68}N_{12}O_9SiNa$   $[M+Na]^+$ : 1283.4899, found: 1261.5077 and 1283.4891.



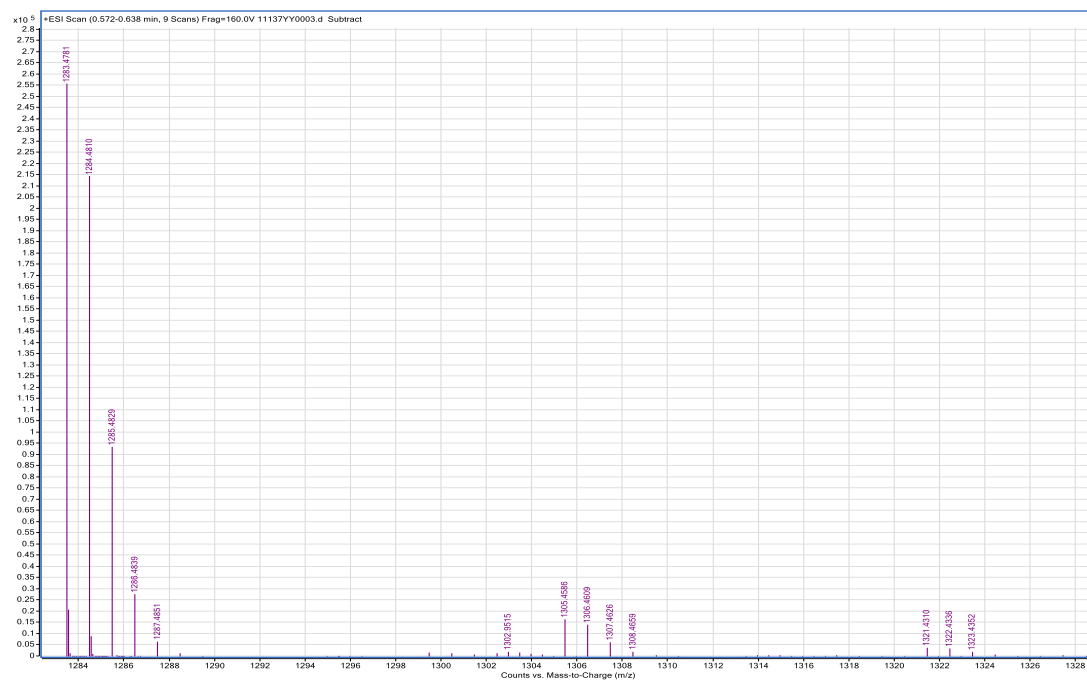

**Figure S13.** HRMS-ESI of compound **9**. Calculated for  $C_{69}H_{66}N_{12}O_{12}Si$ :  $[M + H]^+$ : 1283.4771 found m/z 1283.4781.

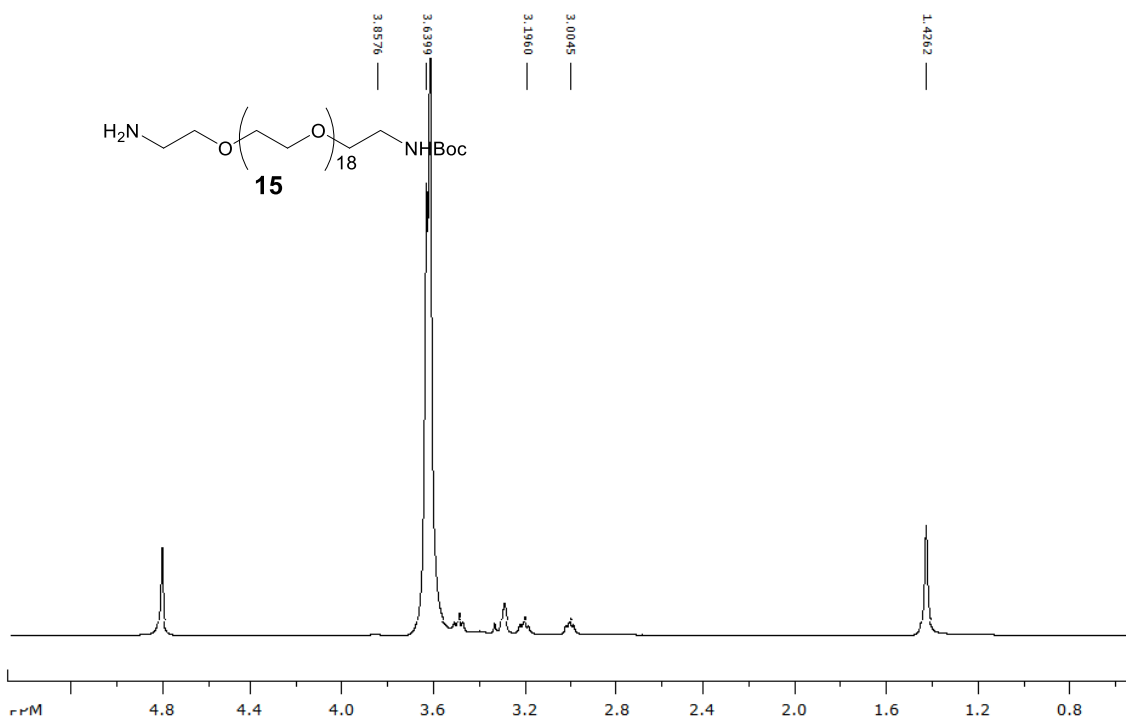

**Figure S14.**  $^1\text{H}$ -NMR of compound **15**.

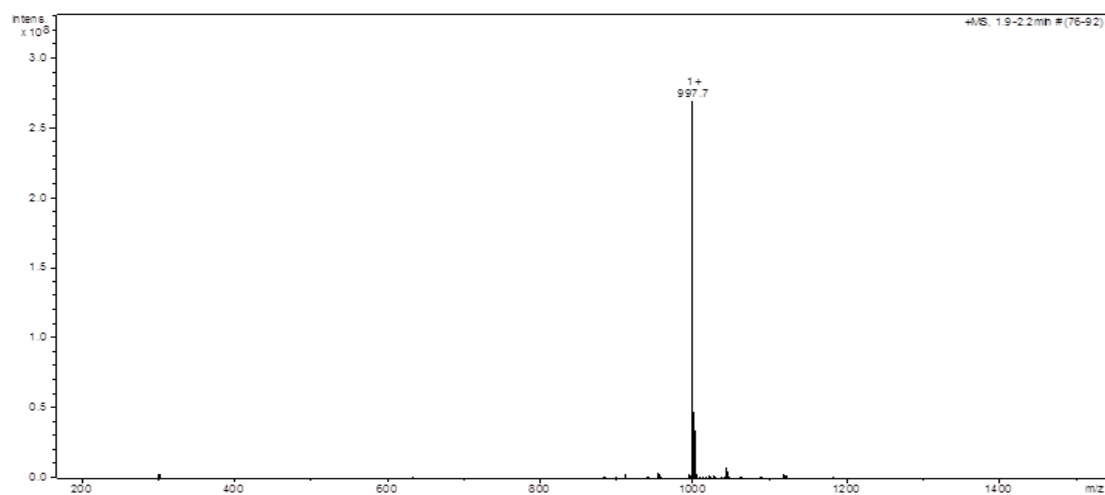

**Figure S15.** LRMS (ESI) of compound **15**. Calculated for  $\text{C}_{45}\text{H}_{93}\text{N}_2\text{O}_{21}$   $[\text{M} + \text{H}]^+$ : 997.7, found:  $m/z$  997.7.

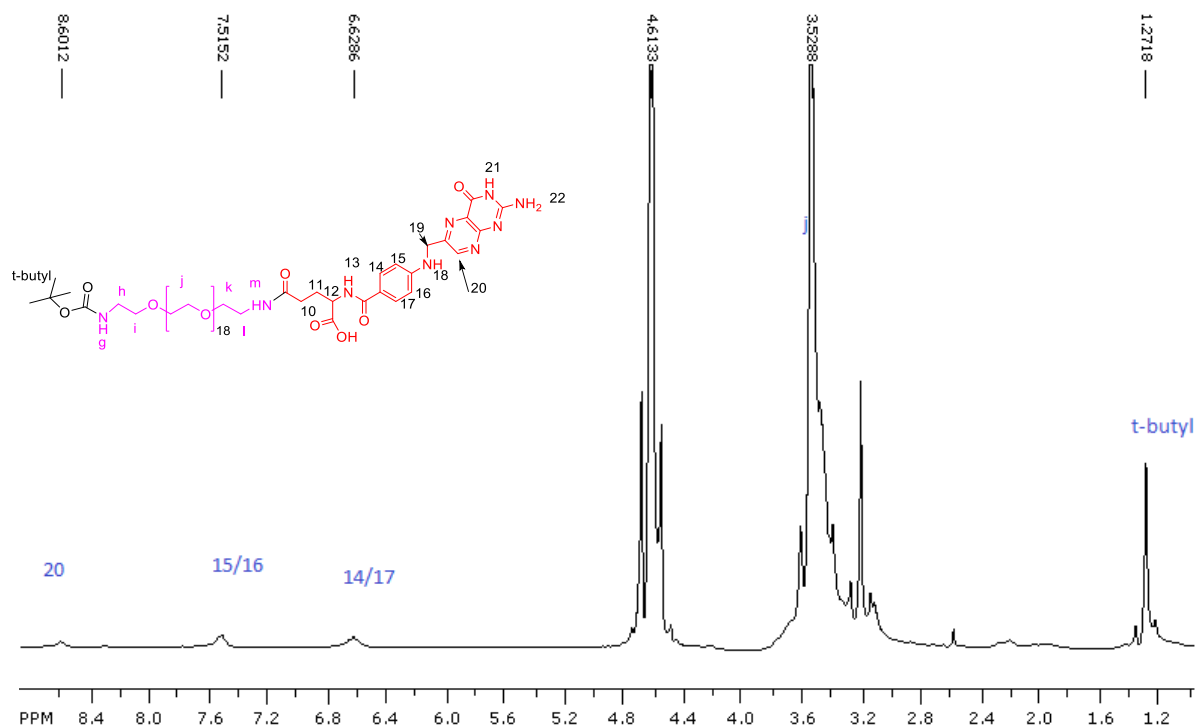

**Figure S16.**  $^1\text{H}$ -NMR of compound 17.

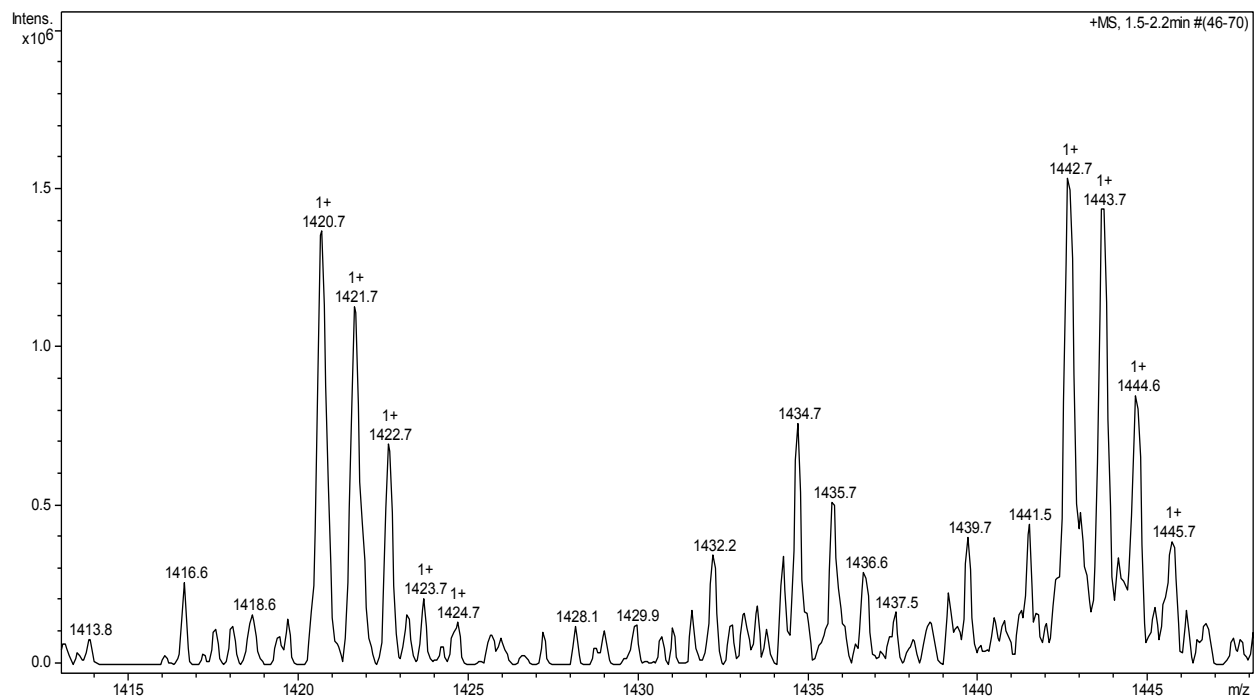

**Figure S17.** LRMS (ion trap) of 17. Calculated  $\text{C}_{64}\text{H}_{110}\text{N}_9\text{O}_{26}$   $[\text{M}+\text{H}]^+$ : 1420.7, found:  $M/z$  1420.7.

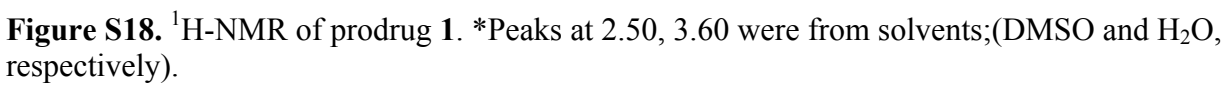



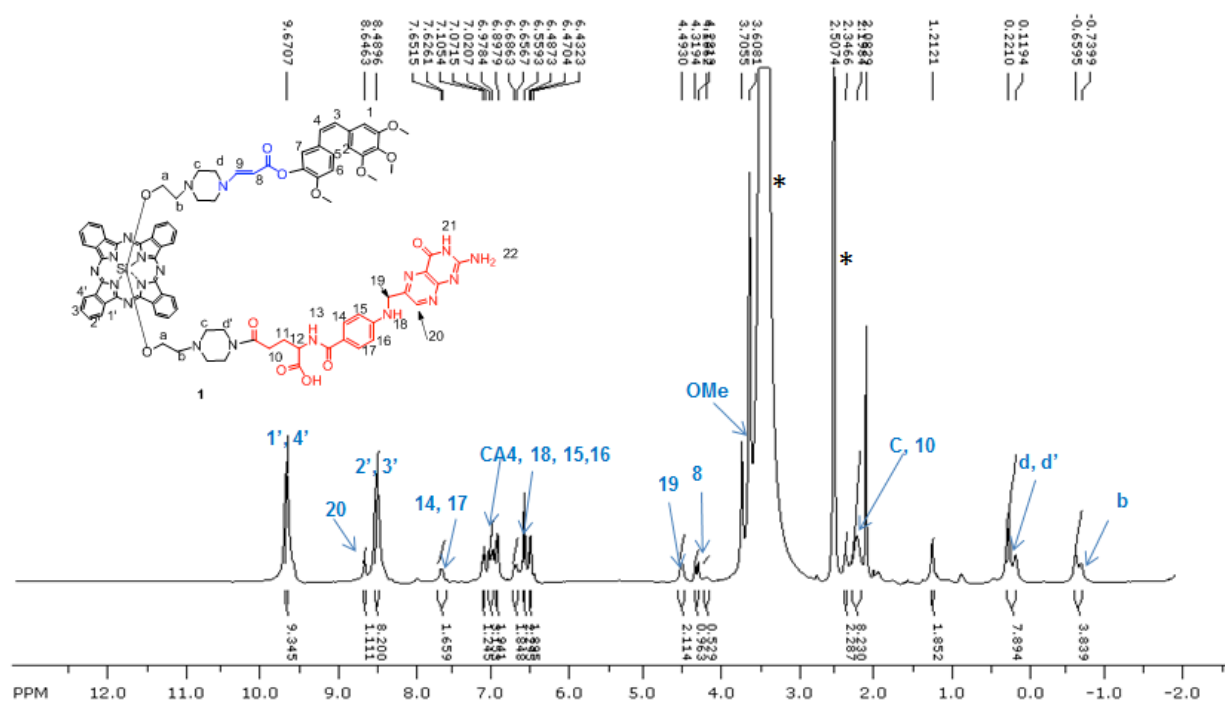

**Figure S19.** Assignment of peaks to the  $^1\text{H}$ -NMR of prodrug **1**.

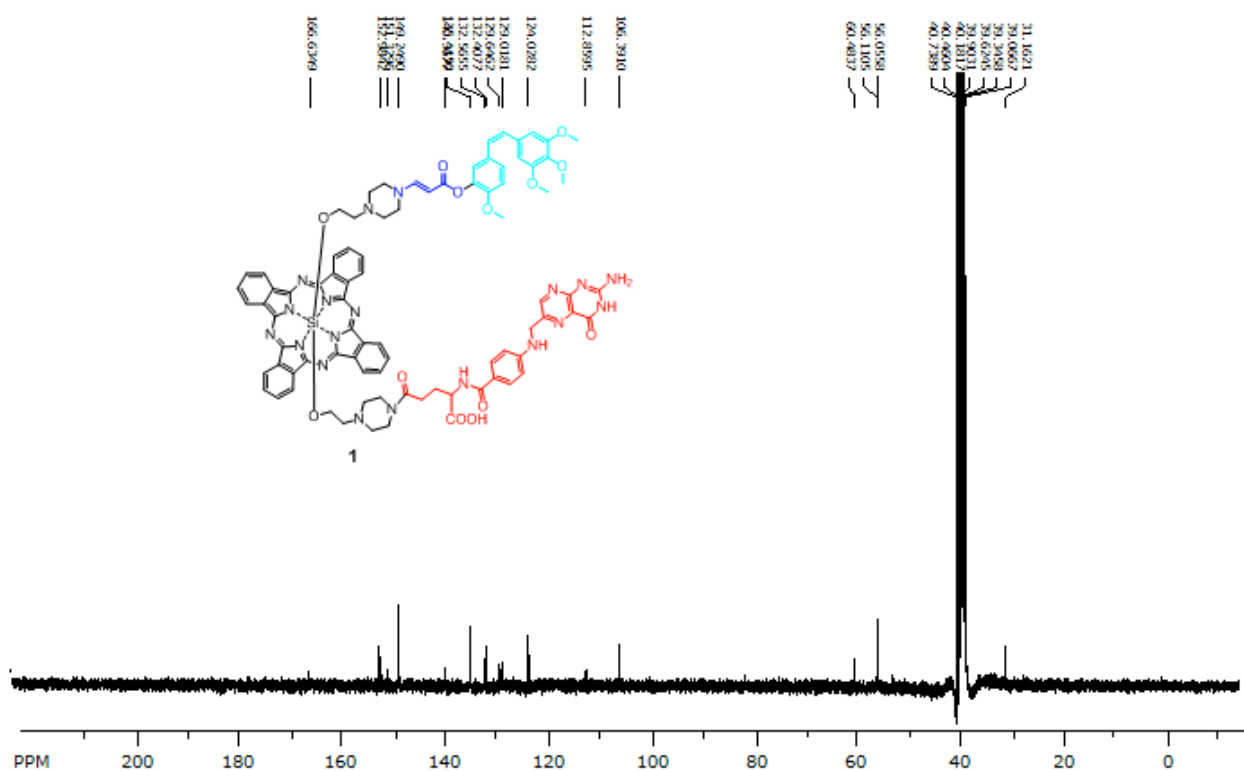

**Figure S20.**  $^{13}\text{C}$ -NMR of prodrug **1**.

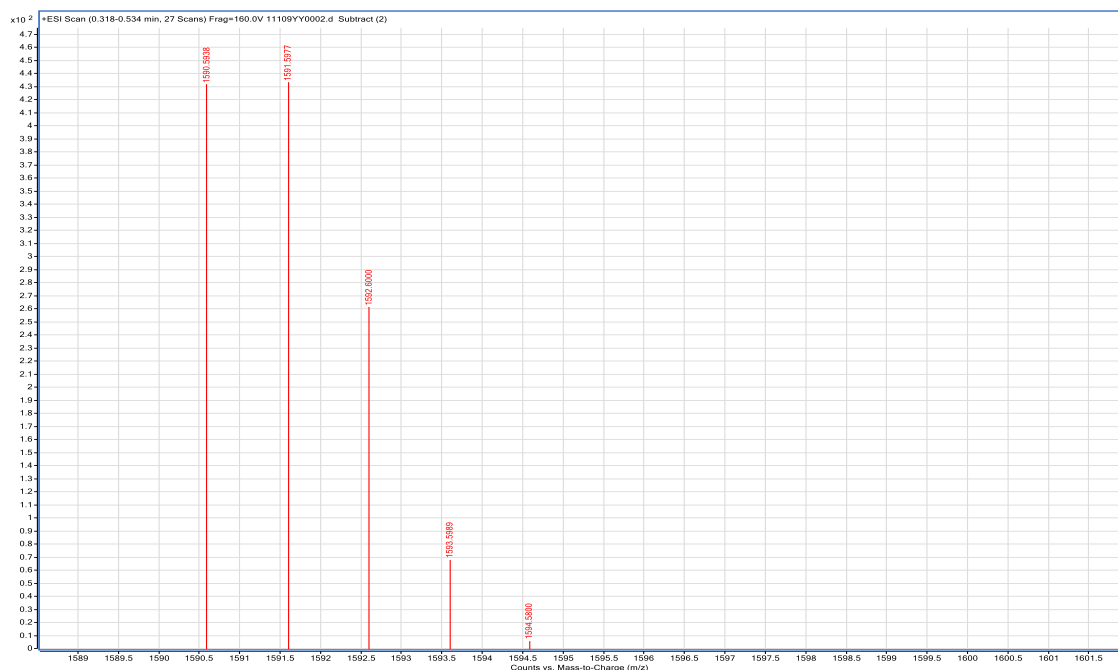

**Figure S21.** HRMS (ESI) of prodrug **1**. Calculated for  $C_{84}H_{59}N_{20}O_{13}Si$   $[M + H]^+$ : 1590.5952, found: 1590.5938.

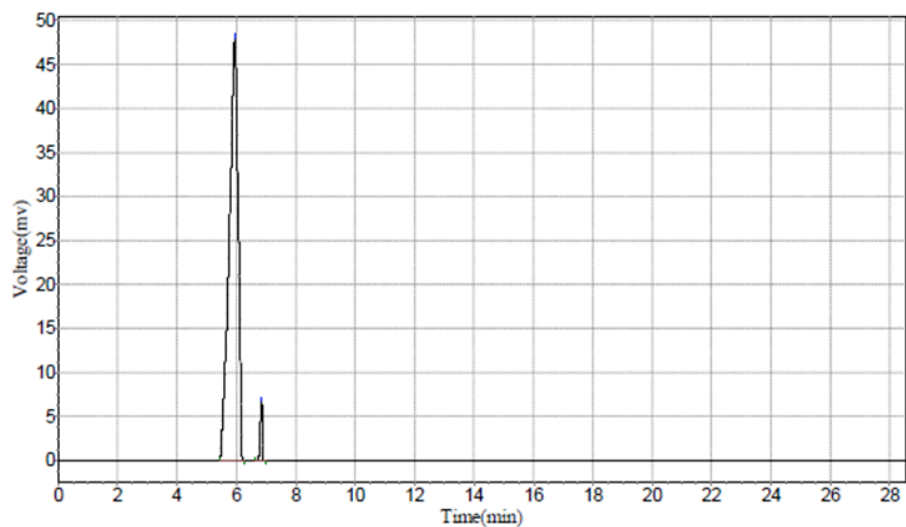

| Results  |         |          |           |             |          |
|----------|---------|----------|-----------|-------------|----------|
| Peak No. | Peak ID | Ret Time | Height    | Area        | Conc.    |
| 1        |         | 5.940    | 47965.398 | 1001771.625 | 96.2589  |
| 2        |         | 6.848    | 6831.381  | 38933.301   | 3.7411   |
| Total    |         |          | 54796.779 | 1040704.926 | 100.0000 |

**Figure S22.** HPLC chromatogram of prodrug **1**. Retention time 5.9 min. Method: Isocratic, solvent system: 50% ACN 50%  $H_2O$ , flow rate 0.5 mL/min, Detection at 254 nm, and purity: 96%.

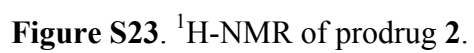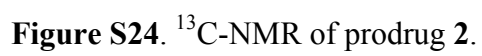

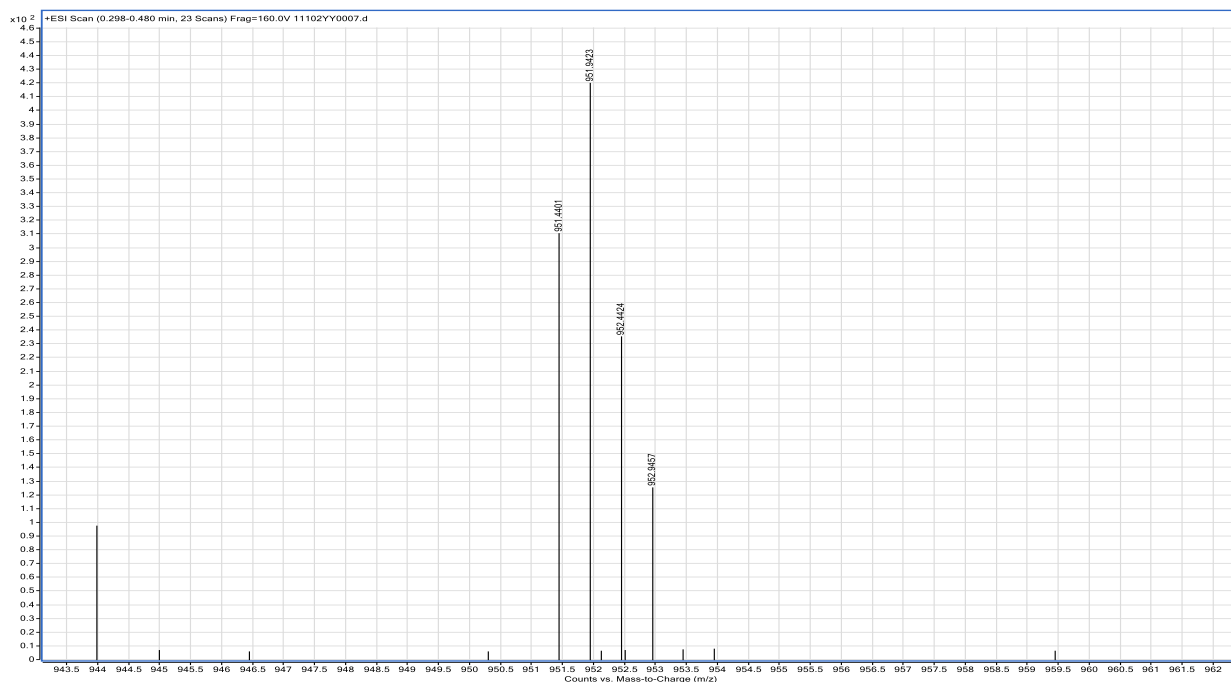

**Figure S25.** HRMS-ESI of prodrug **2**. Calculated for  $[\text{C}_9\text{H}_{99}\text{N}_{23}\text{O}_{16}\text{SiNa}_2]^{+2}$   $[\text{M}+2\text{Na}]^{+2}$ : 951.8602, found: 951.9423.

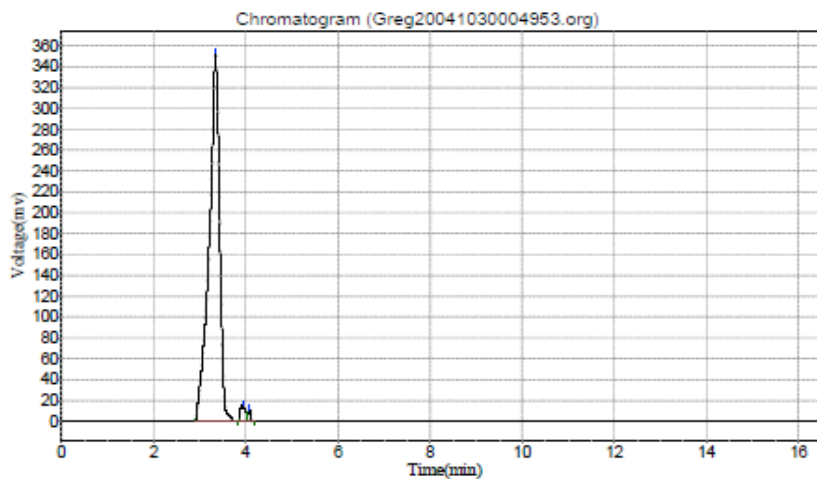

| Results  |         |          |            |             |          |
|----------|---------|----------|------------|-------------|----------|
| Peak No. | Peak ID | Ret Time | Height     | Area        | Conc.    |
| 1        |         | 3.348    | 355075.969 | 5549544.500 | 97.0861  |
| 2        |         | 3.932    | 16456.631  | 129944.125  | 2.2733   |
| 3        |         | 4.073    | 11506.306  | 36620.211   | 0.6406   |
| Total    |         |          | 383038.905 | 5716108.836 | 100.0000 |

**Figure S26.** HPLC chromatogram of prodrug **2**. Retention time 3.4 min. Method: Isocratic, solvent system: 50% ACN 50%  $\text{H}_2\text{O}$ , flow rate 0.5 mL/min, Detection at 254 nm, and purity: 97%.

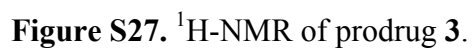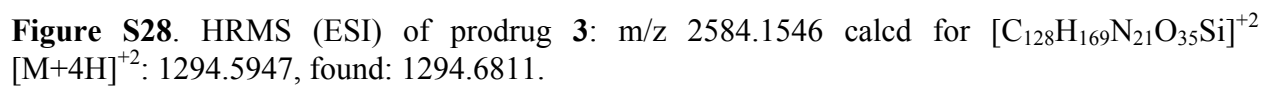

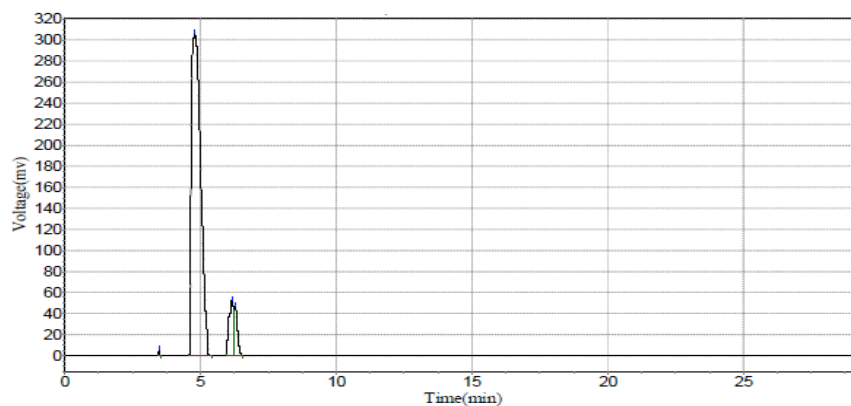

| Results  |         |          |            |             |          |
|----------|---------|----------|------------|-------------|----------|
| Peak No. | Peak ID | Ret Time | Height     | Area        | Conc.    |
| 1        |         | 3.465    | 5709.000   | 14762.400   | 0.1774   |
| 2        |         | 4.782    | 306122.813 | 7286394.000 | 87.5451  |
| 3        |         | 6.157    | 52182.656  | 622986.875  | 7.4851   |
| 4        |         | 6.273    | 47067.473  | 398874.313  | 4.7924   |
| Total    |         |          | 411081.941 | 8323017.588 | 100.0000 |

**Figure S29.** HPLC chromatogram of prodrug **3**. Retention time 4.74 min. Method: Isocratic, solvent system: 60% ACN 40% H<sub>2</sub>O, flow rate 0.5 mL/min, Detection at 254 nm, and purity: 87%.

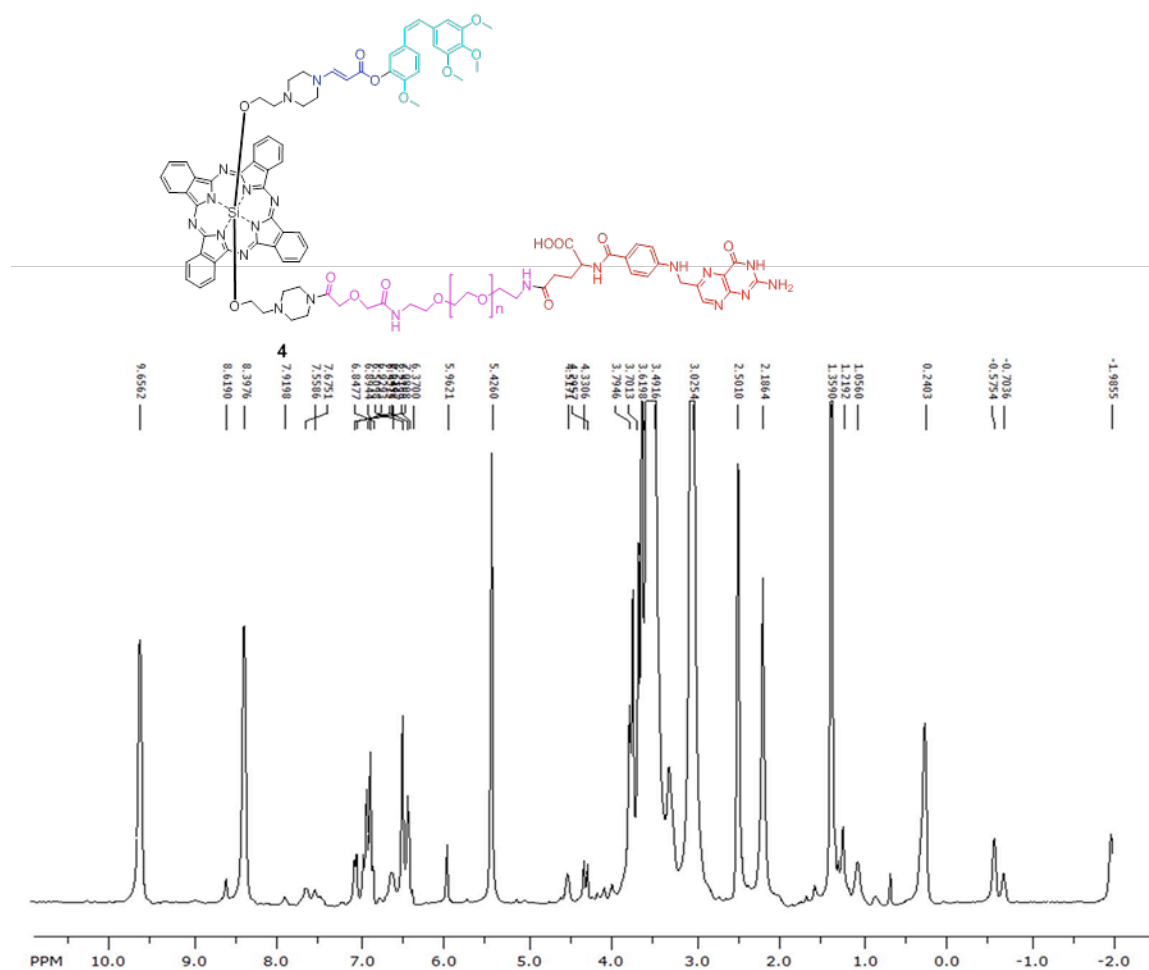

**Figure S30:**  $^1\text{H}$ -NMR of prodrug 4.

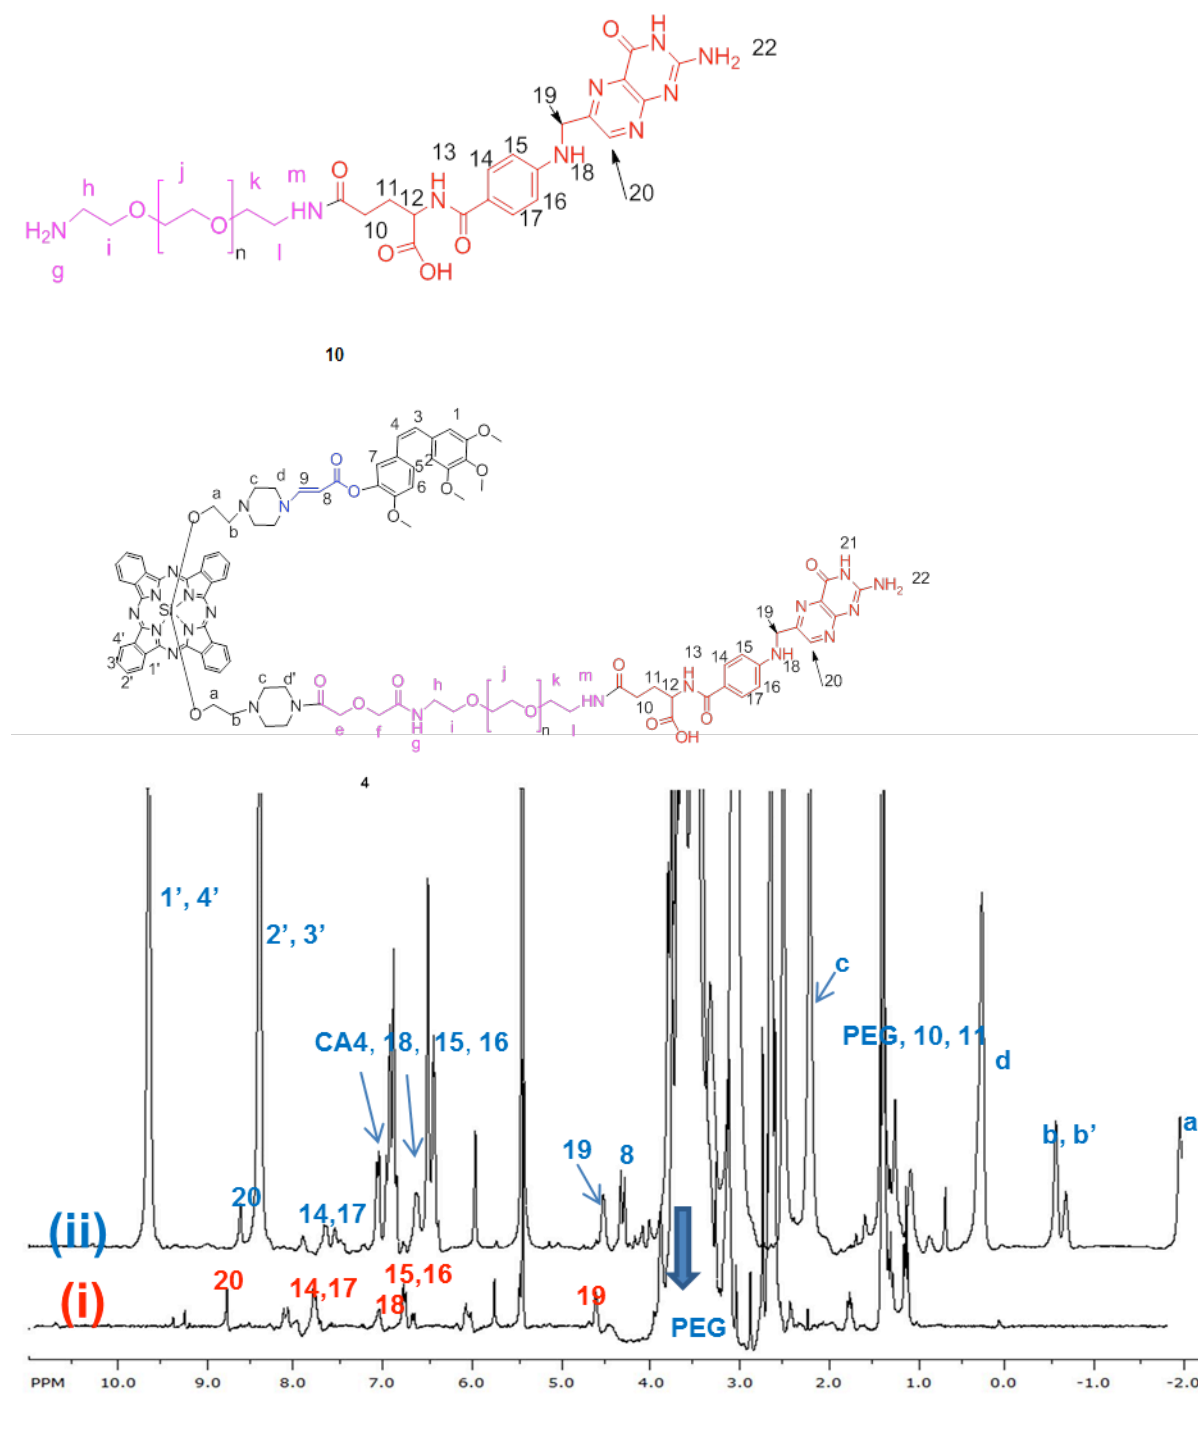

**Figure S31.** Assignment of peaks on the  $^1\text{H}$ -NMR of (i)  $\text{NH}_2\text{-PEG}_{45}\text{-FA}$  and (ii) prodrug **4**. The peaks at 2.5, 3.05, and 5.39 ppm were from the following solvents: DMSO,  $\text{H}_2\text{O}$ , and DCM, respectively.



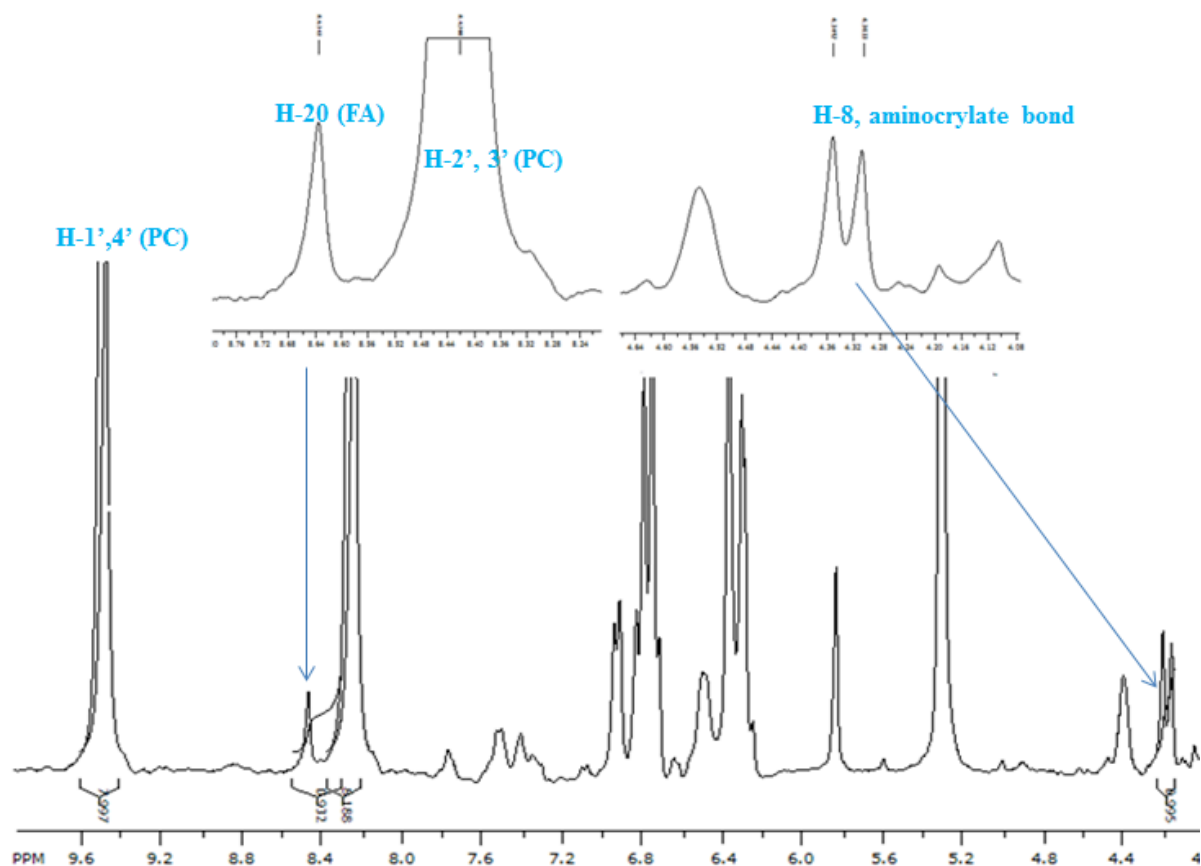

**Figure S32:** The integration of the  $^1\text{H}$ -NMR peaks at 8.63 ppm (H-20) and 4.33 (H-8) ppm of FA and aminoacrylate bond respectively with respect to the peaks at 9.63 ppm (H-1', 4', 8H) and 8.39 ppm (H-2', 3', 8H) of the phthalocyanine (Pc) core. Based peaks indicate an almost 1:1 ratio (0.913 vs. 0.995) of the conjugated FA and CA4, thereby demonstrating a complete reaction between compounds **9** and **10** to produce the prodrug **4**. NB. These are the only two isolated peaks from compounds **9** and **10** that could be integrated with some degree of certainty. The rest of the peaks overlap with each other.

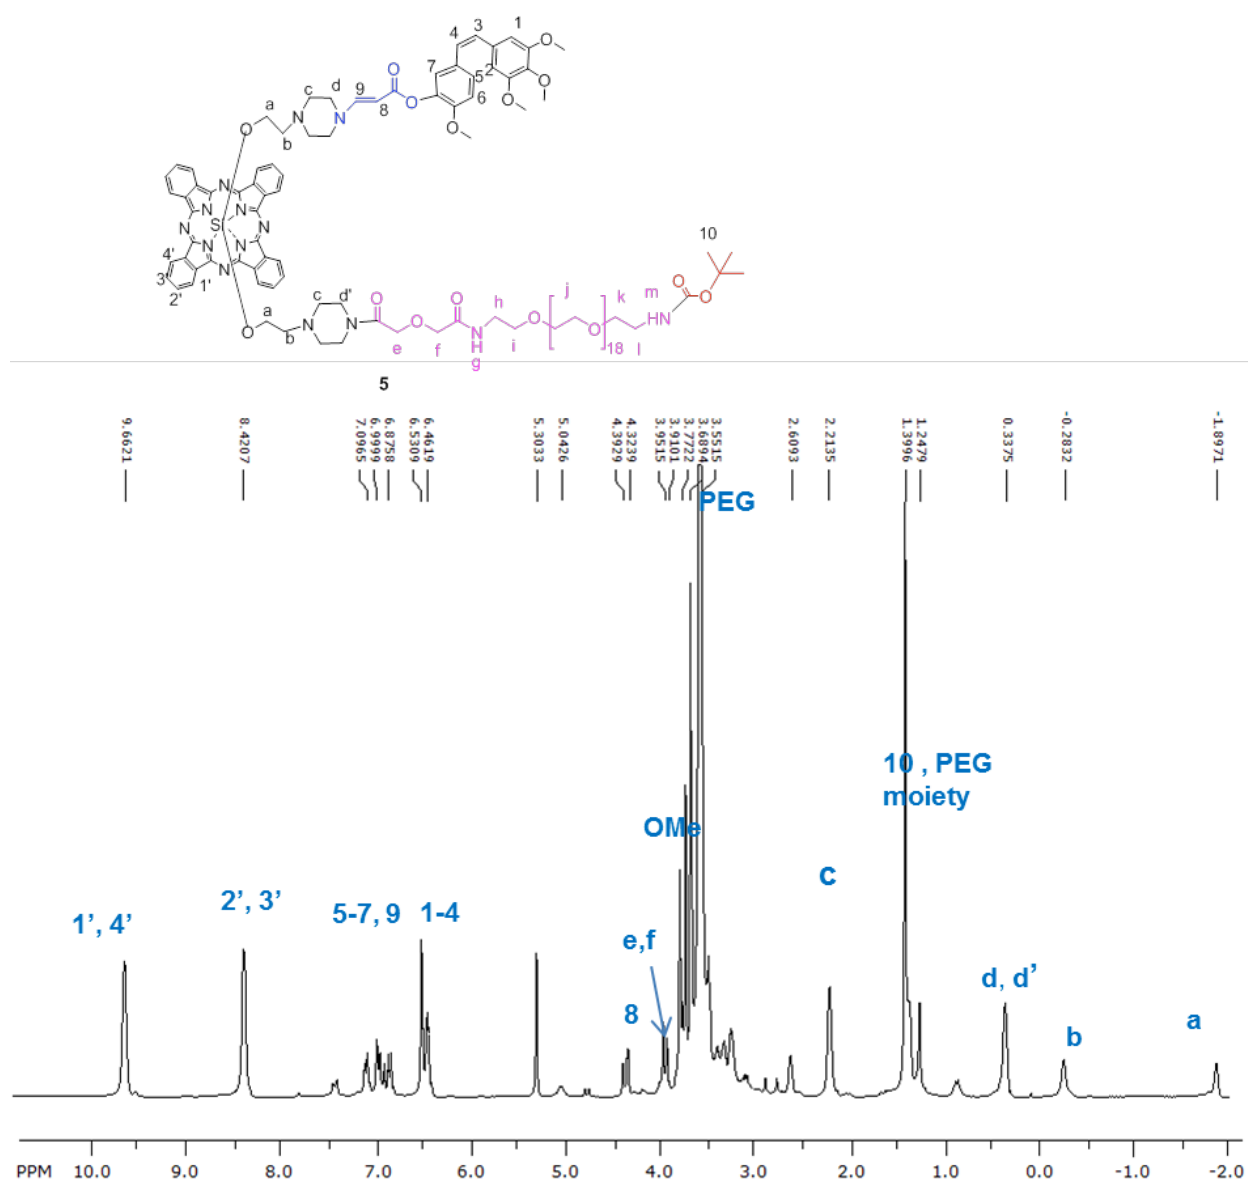

**Figure S33.** <sup>1</sup>H-NMR of Prodrug **5**. The peak at 5.30 ppm is the DCM peak.

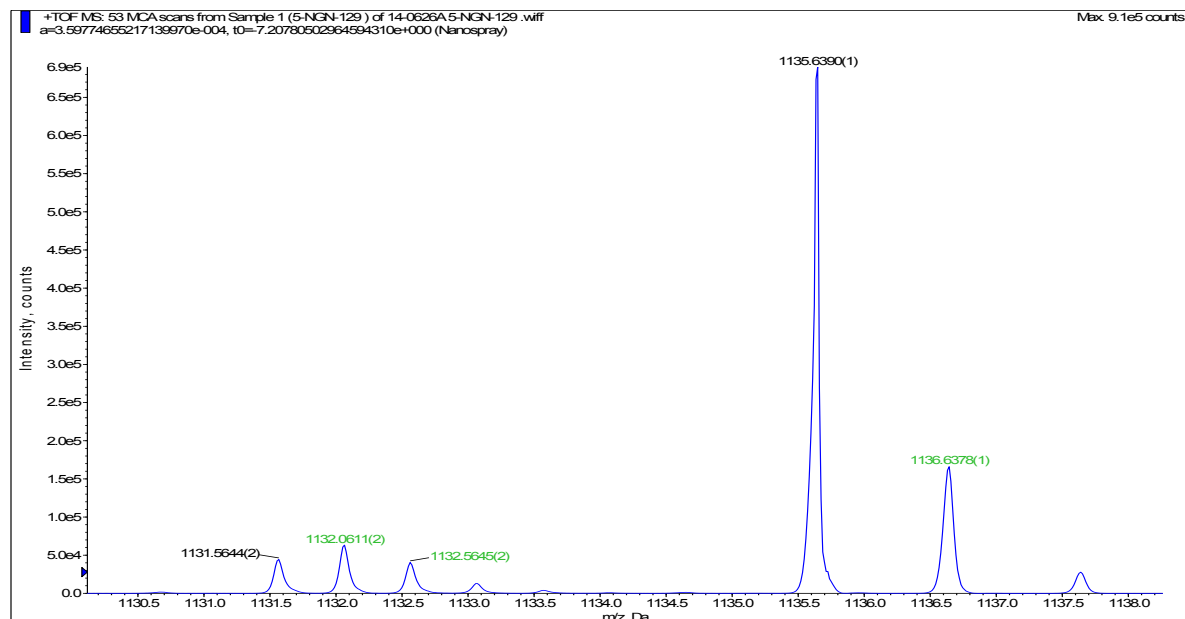

**Figure S34.** HRMS (TOF) of prodrug **5**. HRMS (ESI):  $m/z=2261.0779$  calcd for  $[C_{114}H_{158}N_{14}O_{32}Si]^{+2} [M+2H]^{+2}$ : 1131.5468 (81.1%) and 1132.0462 (100%), found: 1131.5644 (81.1%) and 1132.0611(100%).

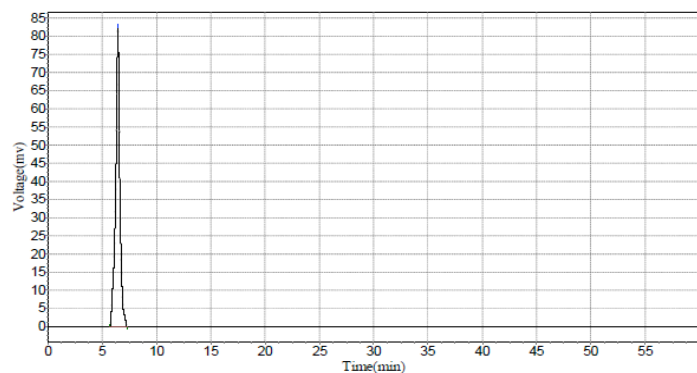

| Results  |         |          |           |             |          |
|----------|---------|----------|-----------|-------------|----------|
| Peak No. | Peak ID | Ret Time | Height    | Area        | Conc.    |
| 1        |         | 6.440    | 82370.523 | 2283782.500 | 100.0000 |
| Total    |         |          | 82370.523 | 2283782.500 | 100.0000 |

**Figure S35.** HPLC chromatogram of prodrug **5**. Retention time 6.44 min. Method: Isocratic, solvent system: 60% ACN 40% H<sub>2</sub>O, flow rate 0.5 mL/min.

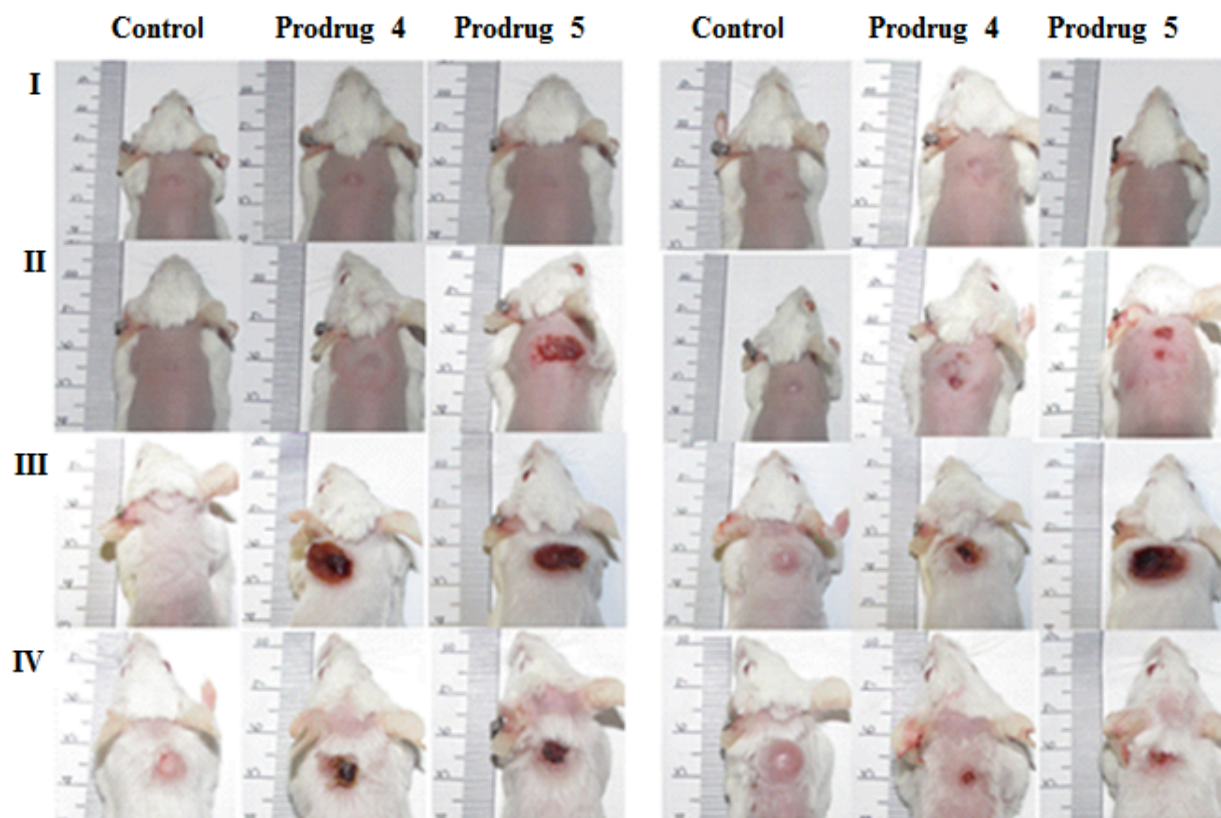

**Figure S36.** Photographic images of the other two groups of mice (3 mice per group) treated with prodrug (none, 4, or 5 at 2  $\mu\text{mol/kg}$ ) with illumination (690 nm laser, 12 mm diameter circular beam, 100  $\text{mW/cm}^2$ , 30 min,) 7 h post IV administration of the prodrug: (i) day 0 before illumination, (ii) day 1, (iii) day 6, and (iv) day 15 post-illumination.

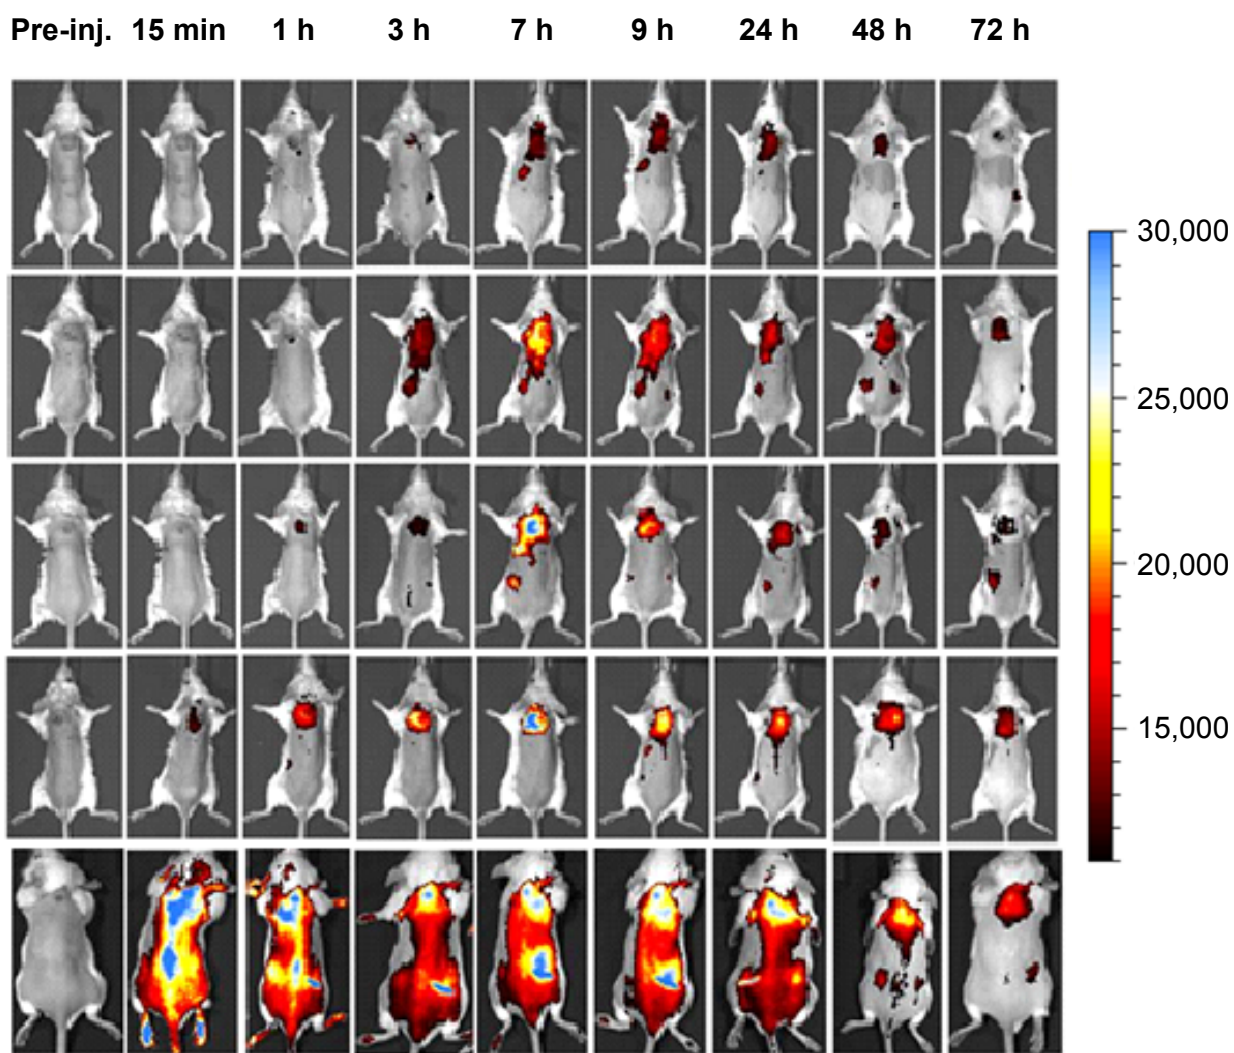

**Figure S37.** Additional data set of time-dependent preclinical fluorescence images of prodrugs 1-5 (Fig. 5A). Images of Balb/c mice bearing SC colon 26 tumors were taken before and at 0.25, 1, 3, 7, 9, 24, 48, and 72 h post IV injection of the prodrugs (2  $\mu$ mol/kg).
